# Supplementary material for: Neutrophil Interactions Stimulate Evasive Hyphal Branching by Aspergillus fumigatus
Source: PubMed Central journal article supplement (PMC5261818; doi:10.1371/journal.ppat.1006154), 2017-01-11
Supplement: ppat.1006154.s001.pdf [file ppat.1006154.s001.pdf]

**Table S1. Transplant patient information**

| <b>Patient</b> | <b>Organ</b>              | <b>Biopsy Result</b>             | <b>Time since transplant (days)</b> | <b>Treatment (Daily doses)</b>                     |
|----------------|---------------------------|----------------------------------|-------------------------------------|----------------------------------------------------|
| 1              | Kidney (2 <sup>nd</sup> ) | CNI toxicity                     | 16                                  | MMF: 500 mg<br>Prednisone: 15 mg<br>TAC: 2 mg      |
| 2              | Kidney                    | ACR Banff 2A                     | 50                                  | MMF: 1g<br>Belatacept: 650 mg<br>Prednisone: 20 mg |
| 3              | Kidney                    | Chronic acute cellular rejection | 3039                                | MMF: 500 mg<br>Prednisone: 5 mg<br>TAC: 6 mg       |
